# Supplementary material for: Amphiphilic oligoamides as versatile, acid-responsive gelators
Source: Royal Society of Chemistry journal article supplement (doi:10.1039/c7ra03074f), 2017-01-01
Supplement: c7ra03074f1.pdf [file c7ra03074f1.pdf]

# Supporting Information

## **Amphiphilic Oligoamides as Versatile, Acid-Responsive Gelators**

Qiang Pei,<sup>a,b</sup> Quan Tang,<sup>a</sup> Zheng-Li Tan,<sup>a</sup> Zhong-Lin Lu,<sup>a\*</sup> Lan He<sup>a,c\*</sup> and Bing Gong<sup>a,d\*</sup>

<sup>a</sup> College of Chemistry, Beijing Normal University, 100875, Beijing, China

<sup>b</sup> College of Chemistry and Chemical Engineering, Xinyang Normal University, 464000, Xinyang, China.

<sup>c</sup> National Institute for Food and Drug Control, Institute of Chemical Drug Control, TianTanXiLi 2, Beijing, 100050, China

<sup>d</sup> Department of Chemistry, University at Buffalo, The State University of New York, Buffalo, NY 14260, United States.

E-mail: luzl@bnu.edu.cn

helan1961@aliyun.com

bgong@buffalo.edu

## Table of Contents

|                                                                               |     |
|-------------------------------------------------------------------------------|-----|
| <b>1. Synthesis and Characterization</b>                                      | S3  |
| <b>2. Gelation Tests and Additional Gel Images</b>                            | S8  |
| <b>3. UV-Vis and Fluorescence Spectroscopy</b>                                | S9  |
| <b>4. 1D and 2D NMR Spectroscopy</b>                                          | S10 |
| <b>5. Loading and releasing experiments</b>                                   | S12 |
| <b>6. IR, HRMS, <sup>1</sup>H NMR and <sup>13</sup>C NMR Spectra of G1-G6</b> | S13 |

# 1. Synthesis and Characterization

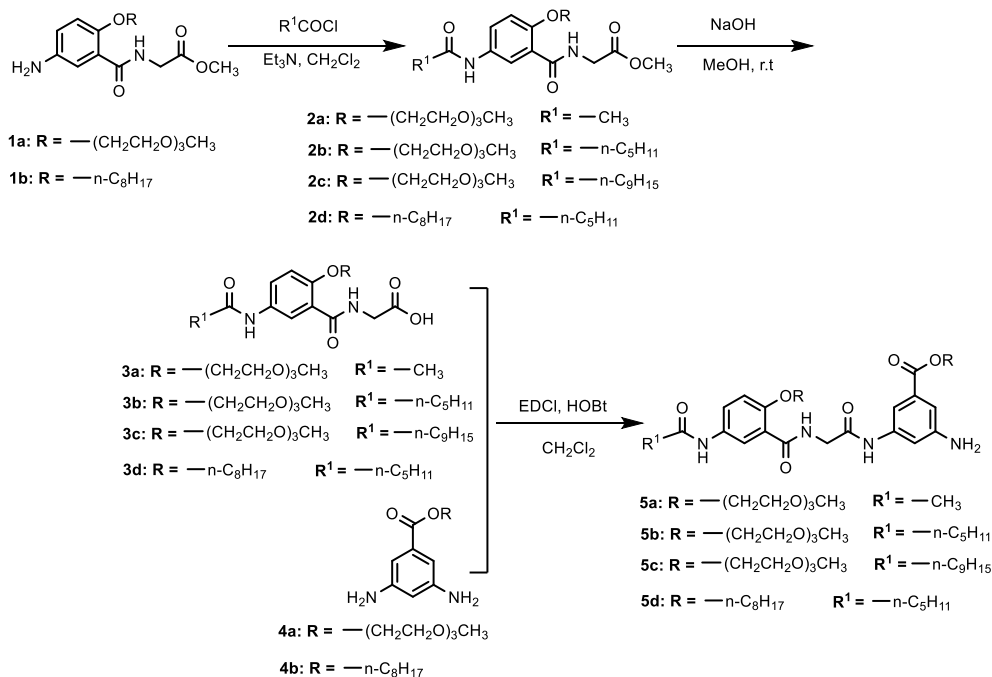

**Scheme S1** Synthetic route to compound **5a-d**

Compounds **1a**, **1b**, **4a** and **4b** were prepared according to the previously reported method.<sup>S1-S7</sup>

**General procedure for the synthesis of compounds 2a-2d.** A solution of appropriate acid chloride (15.0 mmol) in  $\text{CH}_2\text{Cl}_2$  (50 mL) was added to a solution of amine **1a** or **1b** (15.0 mmol) and triethylamine (15.0 mmol) in  $\text{CH}_2\text{Cl}_2$  (100 mL) over a period of 30 minutes at  $0^\circ\text{C}$ . After addition, the ice-water bath was removed, and the reaction mixture was allowed to warm to room temperature. After 4 hrs, the solvent was washed with 1 M HCl, saturated aqueous  $\text{NaHCO}_3$  and NaCl solution in sequence, dried over anhydrous  $\text{Na}_2\text{SO}_4$  and then concentrated in vacuo. The residue was purified by column chromatography (petroleum ether / acetone = 4 / 1).

**Compound 2a.** White solid (5.1 g, 82%). IR (KBr,  $\text{cm}^{-1}$ ): 3423, 3354, 3308, 2956, 2894, 2875, 1759, 1687, 1636, 1551, 1499, 1370, 1319, 1251, 1207, 1099.  $^1\text{H}$  NMR (400 MHz,  $\text{CDCl}_3$ ):  $\delta$  8.75 (t,  $J = 5.0$  Hz, 1H), 8.15 (dd,  $J = 9.0, 2.8$  Hz, 1H), 7.84 (d,  $J = 2.8$  Hz, 1H), 6.93 (d,  $J = 9.0$  Hz, 1H), 4.26-4.23 (m, 4H), 3.93 (m, 2H), 3.76 (s, 3H), 3.70 (m, 2H), 3.65-3.62 (m, 4H), 3.51 (m, 2H), 3.35 (s, 3H), 2.16 (s, 3H).  $^{13}\text{C}$  NMR (100 MHz,  $\text{CDCl}_3$ ):  $\delta$  170.49, 168.95, 165.30, 153.33, 132.72, 125.51, 123.27, 121.20,

113.76, 71.92, 70.69, 70.63, 70.59, 69.21, 68.77, 59.02, 52.24, 41.89, 24.27. ESI-MS:  $m/z$  calcd for  $C_{19}H_{28}N_2O_8$ : 412.18; found: 413.34  $[M + H]^+$ .

**Compound 2b.** White solid (6.1 g, 87%). IR (KBr,  $cm^{-1}$ ): 3378, 3323, 2956, 2931, 2874, 1741, 1682, 1635, 1543, 1498, 1277, 1245, 1215, 1109.  $^1H$  NMR (400 MHz,  $CDCl_3$ )  $\delta$  8.76 (s, 1H), 8.21 (dd,  $J = 8.9, 2.8$  Hz, 1H), 7.80 (s, 1H), 7.54 (s, 1H), 6.94 (d,  $J = 9.0$  Hz, 1H), 4.28-4.24 (m, 4H), 3.94 (m, 2H), 3.76 (s, 3H), 3.71 (m, 2H), 3.65-3.60 (m, 4H), 3.52 (m, 2H), 3.35 (s, 3H), 2.35 (t,  $J = 7.6$  Hz, 2H), 1.71 (m, 2H), 1.36-1.32 (m, 4H), 0.90 (t,  $J = 7.0$  Hz, 3H).  $^{13}C$  NMR (100 MHz,  $CDCl_3$ )  $\delta$  171.95, 170.44, 165.22, 153.21, 132.76, 125.40, 123.20, 121.18, 113.69, 71.89, 70.66, 70.60, 70.57, 69.19, 68.76, 58.98, 52.19, 41.85, 37.36, 31.48, 25.36, 22.51, 13.97. ESI-MS:  $m/z$  calcd for  $C_{23}H_{36}N_2O_8$ : 468.25; found: 469.43  $[M + H]^+$ .

**Compound 2c.** White solid (6.4 g, 81%). IR (KBr,  $cm^{-1}$ ): 3449, 3326, 2921, 2870, 2851, 1750, 1692, 1539, 1501, 1361, 1305, 1218, 1125.  $^1H$  NMR (400 MHz,  $CDCl_3$ )  $\delta$  8.73 (s, 1H), 8.19 (d,  $J = 8.9$  Hz, 1H), 7.78 (s, 1H), 7.28 (s, 1H), 6.93 (d,  $J = 8.9$  Hz, 1H), 4.27 (m, 4H), 3.94 (m, 2H), 3.78 (s, 3H), 3.73-3.51 (m, 8H), 3.36 (s, 3H), 2.34 (m, 2H), 1.69 (m, 4H), 0.88 (t,  $J = 7.0$  Hz, 1H).  $^{13}C$  NMR (100 MHz,  $CDCl_3$ )  $\delta$  169.11, 167.50, 162.31, 150.24, 129.88, 122.46, 120.29, 118.20, 110.72, 68.94, 67.69, 67.64, 67.58, 66.24, 65.80, 56.01, 49.22, 38.91, 34.42, 28.94, 26.55, 26.42, 26.36, 22.74, 19.72, 11.17. ESI-MS:  $m/z$  calcd for  $C_{27}H_{44}N_2O_8$ : 524.31; found: 525.52  $[M + H]^+$ .

**Compound 2d.** White solid (4.8 g, 71%).  $^1H$  NMR (400MHz,  $CDCl_3$ )  $\delta$  8.69 (s, 1H), 8.19 (dd,  $J = 9.0, 2.7$  Hz, 1H), 7.81 (d,  $J = 2.6$  Hz, 1H), 7.28 (s, 1H), 6.96 (d,  $J = 9.0$  Hz, 1H), 4.27 (d,  $J = 4.8$  Hz, 2H), 4.13 (t,  $J = 6.6$  Hz, 2H), 3.79 (s, 3H), 2.35 (t,  $J = 7.5$  Hz, 2H), 2.04-1.84 (m, 2H), 1.78-1.69 (m, 2H), 1.50-1.27 (m, 14H), 0.90 (m, 6H).

**General procedure for the synthesis of compounds 3a-3d.** Compound 2a-2d (10.0 mmol) was dissolved in MeOH (100 mL), to which the solution of KOH (20.0 mmol, 2 M) was added. The mixture was heated to reflux for 4 hrs. Then, MeOH was removed in vacuo. The aqueous layer was acidified with concentrated HCl until pH = 1, which was extracted with dichloromethane (50 mL  $\times$  3). The organic phase was

dried over anhydrous sodium sulfate, filtered and the solvent was removed under reduced pressure. The residue was purified by column chromatography (CH<sub>2</sub>Cl<sub>2</sub> / CH<sub>3</sub>OH = 30 / 1).

**Compound 3a.** White solid (3.8 g, 96%). IR (KBr, cm<sup>-1</sup>): 3466, 3370, 2931, 2890, 1733, 1647, 1555, 1499, 1252, 1216, 1198, 1102. <sup>1</sup>H NMR(400 MHz, DMSO-*d*<sub>6</sub>): δ 9.96 (s, 1H), 8.61 (dd, *J* = 8.9, 2.8 Hz, 1H), 8.02 (s, 1H), 7.81 (s, 1H), 7.14 (d, *J* = 9.0 Hz, 1H), 4.24 (m, 2H), 4.01 (m, 2H), 3.82 (m, 2H), 3.60 (m, 2H), 3.53-3.48 (m, 4H), 3.41 (m, 2H), 3.22 (s, 3H), 2.02 (s, 3H). <sup>13</sup>C NMR (100 MHz, DMSO-*d*<sub>6</sub>): δ 171.18, 168.06, 164.28, 152.37, 133.13, 123.61, 121.75, 121.50, 114.38, 71.25, 69.86, 69.80, 69.57, 68.82, 68.57, 58.04, 41.44, 23.81. ESI-MS: *m/z* calcd for C<sub>18</sub>H<sub>25</sub>N<sub>2</sub>O<sub>8</sub>: 398.17; found: 399.32 [M + H]<sup>+</sup>.

**Compound 3b.** White solid (4.4 g, 96%). IR (KBr, cm<sup>-1</sup>): 3490, 3389, 3305, 2955, 2933, 2870, 2619, 2503, 1727, 1681, 1551, 1498, 1450, 1286. <sup>1</sup>H NMR (400 MHz, CDCl<sub>3</sub>): δ 8.83 (s, 1H), 8.19 (dd, *J* = 8.9, 2.8 Hz, 1H), 7.81 (s, 1H), 7.52 (s, 1H), 6.94 (d, *J* = 9.0 Hz, 1H), 4.29 (m, 4H), 3.92 (m, 2H), 3.72-3.61 (m, 8H), 3.37 (s, 3H), 2.36 (t, *J* = 7.6 Hz, 2H), 1.72 (m, 2H), 1.35 (m, 4H), 0.90 (t, *J* = 7.0 Hz, 3H). <sup>13</sup>C NMR (100 MHz, CDCl<sub>3</sub>): δ 172.50, 171.36, 165.62, 153.40, 132.64, 125.60, 123.28, 120.75, 113.63, 71.90, 70.73, 70.65, 70.36, 69.28, 68.84, 58.90, 42.46, 37.38, 31.53, 25.43, 22.52, 14.02. ESI-MS: *m/z* calcd for C<sub>22</sub>H<sub>34</sub>N<sub>2</sub>O<sub>8</sub>: 454.23; found: 455.41 [M + H]<sup>+</sup>.

**Compound 3c.** White solid (3.2 g, 63%). IR (KBr, cm<sup>-1</sup>): 3504, 3389, 3309, 2926, 2855, 1730, 1645, 1546, 1497, 1258, 1214, 1105. <sup>1</sup>H NMR(400 MHz, CDCl<sub>3</sub>) δ 8.85 (s, 1H), 8.18 (s, 1H), 8.02 (s, 1H), 7.81 (s, 1H), 7.55 (s, 1H), 4.27 (m, 4H), 3.91 (m, 2H), 3.71-3.61 (m, 8H), 3.41 (s, 3H), 2.36 (t, *J* = 7.0 Hz, 1H), 1.70 (m, 2H), 1.26 (m, 12H), 0.88 (t, *J* = 6.1 Hz, 1H). <sup>13</sup>C NMR (100 MHz, CDCl<sub>3</sub>) δ 172.29, 170.97, 165.14, 152.93, 132.23, 125.18, 122.89, 120.17, 113.08, 71.43, 70.23, 70.15, 69.92, 68.78, 68.32, 58.42, 41.95, 36.91, 31.50, 29.12, 29.00, 28.94, 25.37, 22.28, 13.74. ESI-MS: *m/z* calcd for C<sub>26</sub>H<sub>42</sub>N<sub>2</sub>O<sub>8</sub>: 510.29; found: 511.32 [M + H]<sup>+</sup>.

**Compound 3d.** White solid (3.3 g, 75%). <sup>1</sup>H NMR (400MHz, CDCl<sub>3</sub>) δ 8.78 (t, *J* = 4.7 Hz, 1H), 8.16 (dd, *J* = 9.0, 2.7 Hz, 1H), 7.97 (s, 1H), 7.83 (d, *J* = 2.7 Hz, 1H), 6.92

(d,  $J = 9.1$  Hz, 1H), 4.27 (d,  $J = 4.8$  Hz, 2H), 4.09 (t,  $J = 6.7$  Hz, 2H), 2.36 (t,  $J = 7.6$  Hz, 2H), 1.96 – 1.82 (m, 2H), 1.78 – 1.63 (m, 2H), 1.47 – 1.22 (m, 14H), 0.87 (q,  $J = 6.9$  Hz, 6H).

**General procedure for the synthesis of compounds 5a-5d.** The appropriate acid **3a-3d** (10.0 mmol), 1-ethyl-3-(3-dimethylaminopropyl)-carbodiimide (EDCI, 12.0 mmol) and N-hydroxybenzotriazole (HOBT, 12.0 mmol) were dissolved in dry  $\text{CH}_2\text{Cl}_2$  (50 mL). After stirring at room temperature for 30 minutes, the solution was added dropwise over a period of 10 minutes to the solution of 3,5-diaminobenzoate (**4a** or **4b**, 10.0 mmol) in  $\text{CH}_2\text{Cl}_2$  (100 mL). Stirring was continued for 20 hrs. Then, the solvent was extracted with water (50 mL  $\times$  3), saturated brine (50 mL  $\times$  1). The organic layer was dried over anhydrous  $\text{Na}_2\text{SO}_4$  and concentrated in vacuo. The residue was purified by column chromatography ( $\text{CH}_2\text{Cl}_2 / \text{CH}_3\text{OH} = 15 / 1$ ).

**Compound 5a.** White solid (3.7 g, 54%). IR (KBr,  $\text{cm}^{-1}$ ): 3420, 3375, 3347, 3278, 3246, 3163, 3109, 2928, 2887, 1698, 1636, 1538, 1243, 1220, 1109.  $^1\text{H}$  NMR (400 MHz,  $\text{CDCl}_3$ ):  $\delta$  10.00 (s, 1H), 9.96 (s, 1H), 8.70 (t,  $J = 5.3$  Hz, 1H), 8.05 (d,  $J = 2.8$  Hz, 1H), 7.81 (dd,  $J = 8.9, 2.8$  Hz, 1H), 7.35 (s, 1H), 7.17 (s, 1H), 7.15 (s, 1H), 6.92 (s, 1H), 5.44 (s, 2H), 4.33 (m, 2H), 4.27 (m, 2H), 4.15 (m, 2H), 3.87 (m, 2H), 3.72 (m, 2H), 3.61-3.35 (m, 16H), 3.21 (s, 3H), 3.18 (s, 3H), 2.02 (s, 3H).  $^{13}\text{C}$  NMR (100 MHz,  $\text{DMSO-}d_6$ ):  $\delta$  168.03, 167.33, 166.13, 164.26, 152.42, 149.43, 139.65, 133.08, 130.51, 123.55, 121.77, 121.59, 114.29, 109.78, 108.74, 107.80, 71.24, 71.19, 69.89, 69.86, 69.76, 69.62, 69.50, 68.87, 68.62, 68.44, 63.82, 58.00, 57.97, 43.50, 23.80. ESI-MS:  $m/z$  calcd for  $\text{C}_{32}\text{H}_{46}\text{N}_2\text{O}_8$ : 678.31; found: 679.60  $[\text{M} + \text{H}]^+$ .

**Compound 5b.** White solid (4.2 g, 57%). IR (KBr,  $\text{cm}^{-1}$ ): 3456, 3369, 3310, 3278, 3249, 3162, 3110, 2951, 2927, 2871, 1700, 1690, 1636, 1560, 1539, 1497, 1244, 1223, 1107, 1053.  $^1\text{H}$  NMR (400 MHz,  $\text{DMSO-}d_6$ )  $\delta$  9.75 (s, 1H), 9.21 (s, 1H), 8.79 (s, 1H), 8.24 (d,  $J = 6.7$  Hz, 1H), 7.84 (s, 3H), 7.78 (s, 1H), 7.39 (s, 1H), 7.02 (s, 1H), 6.85 (d,  $J = 9.0$  Hz, 1H), 4.48-4.45 (m, 4H), 4.22 (m, 2H), 4.02 (m, 2H), 3.82-3.47 (m, 18H), 3.34 (s, 3H), 3.29 (s, 3H), 2.42 (t,  $J = 3.5$  Hz, 2H), 1.71 (m, 2H), 1.32 (m, 4H), 0.89 (t,  $J = 6.8$  Hz, 3H);  $^{13}\text{C}$  NMR (100 MHz,  $\text{DMSO-}d_6$ )  $\delta$  172.18, 167.01, 166.89,

164.72, 153.40, 147.75, 139.74, 132.52, 130.68, 125.22, 122.66, 120.34, 112.88, 111.06, 110.54, 110.33, 71.89, 71.82, 70.73, 70.58, 70.44, 70.38, 69.22, 69.08, 68.90, 64.55, 58.97, 58.87, 45.32, 37.15, 31.54, 25.24, 22.53, 13.98. ESI-MS:  $m/z$  calcd for  $C_{36}H_{54}N_4O_{12}$ : 734.37; found: 735.88  $[M + H]^+$ .

**Compound 5c.** White solid (4.2 g, 53%). IR (KBr,  $cm^{-1}$ ): 3429, 3364, 3323, 3280, 3251, 3114, 2927, 2857, 1701, 1636, 1539, 1244, 1225, 1112, 1055.  $^1H$  NMR(400MHz,  $CDCl_3$ )  $\delta$  9.59 (s, 1H), 9.18 (s, 1H), 8.44 (s, 1H), 8.25 (d,  $J = 8.2$  Hz, 1H), 7.90 (s, 1H), 7.78 (s, 1H), 7.40 (s, 1H), 7.09 (s, 1H), 6.94 (d,  $J = 9.0$  Hz, 1H), 4.43 (m, 4H), 4.27 (m, 2H), 4.00 (m, 2H), 3.99-3.49 (m, 18H), 3.36 (s, 3H), 3.33 (s, 3H), 2.40 (m, 2H), 1.70(m, 2H), 1.25 (m, 12H), 0.89 (t,  $J = 5.9$  Hz, 3H).  $^{13}C$  NMR(100 MHz,  $CDCl_3$ )  $\delta$  171.99, 166.78, 166.60, 164.33, 153.18, 147.70, 139.58, 132.34, 130.42, 124.90, 122.43, 120.08, 110.80, 110.24, 109.96, 71.71, 71.63, 70.53, 70.39, 70.36, 70.15, 69.01, 68.86, 68.66, 64.37, 58.72, 58.62, 45.11, 36.97, 31.71, 29.44, 29.36, 29.29, 29.17, 25.38, 22.47, 13.93. ESI-MS:  $m/z$  calcd for  $C_{40}H_{62}N_4O_{12}$ : 790.44; found:791.46  $[M + H]^+$ .

**Compound 5d.** White solid (3.4 g, 50%).  $^1H$  NMR (400MHz,  $DMSO-d_6$ )  $\delta$  10.03 (s, 1H), 9.89 (s, 1H), 8.67 (t,  $J = 4.9$  Hz, 1H), 8.07 (d,  $J = 2.7$  Hz, 1H), 7.81 (dd,  $J = 8.9, 2.7$  Hz, 1H), 7.42 (s, 1H), 7.13 (d,  $J = 9.0$  Hz, 1H), 7.09 (s, 1H), 6.91 (s, 1H), 5.43 (s, 2H), 4.20-4.12 (m, 6H), 2.27 (t,  $J = 7.4$  Hz, 2H), 1.85 (m, 2H), 1.71-1.53 (m, 4H), 1.47- 1.12 (m, 24H), 0.89-0.74 (m, 9H).

## Notes and references

[S1] Guo, Z. Q.; Tong, W. L.; Chan, M. C. W. *Chem. Commun.* **2014**, 50, 1711.

[S2] Raju, M. V. R.; Lin, H. C. *Org. Lett.* **2014**, 16, 5564.

[S3] Li, M. F.; Yamato, K.; Ferguson, J. S.; Gong, B. *J. Am. Chem. Soc.* **2006**, 128, 12628.

[S4] Li, M. F.; Yamato, K.; Ferguson, J. S.; Gong, B. *J. Am. Chem. Soc.* **2008**, 130, 491.

[S5] Zeng, H. Q.; Miller, R. S.; Flowers, R. A.; Gong, B. *J. Am. Chem. Soc.* **2000**, 122, 2635.

[S5] Zeng, H. Q.; Ickes, H.; Flowers, R. A.; Gong, B. *J. Org. Chem.* **2001**, 66, 3574.

[S7] Zeng, H. Q.; Yang, X. W.; Flowers, R. A.; Gong, B. *J. Am. Chem. Soc.* **2002**, 124, 2903.

## 2. Gelation Tests and Additional Gel Images

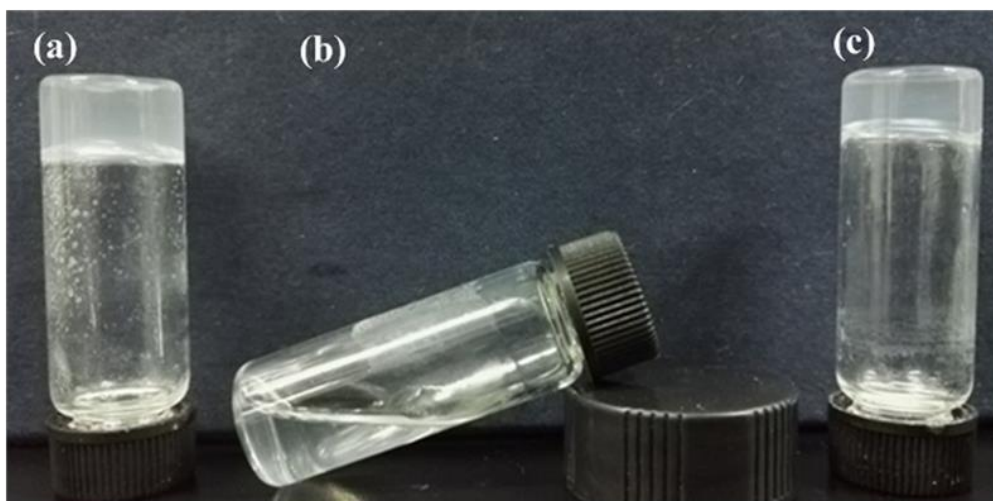

**Fig. S1** Images of **G2** at a concentration of  $10 \text{ mg mL}^{-1}$  under different conditions (a) neutral water; (b) acidulated by HCl (1 M,  $5 \mu\text{L}$ ); (c) added  $5 \mu\text{L}$   $\text{Et}_3\text{N}$  into the acidified solution

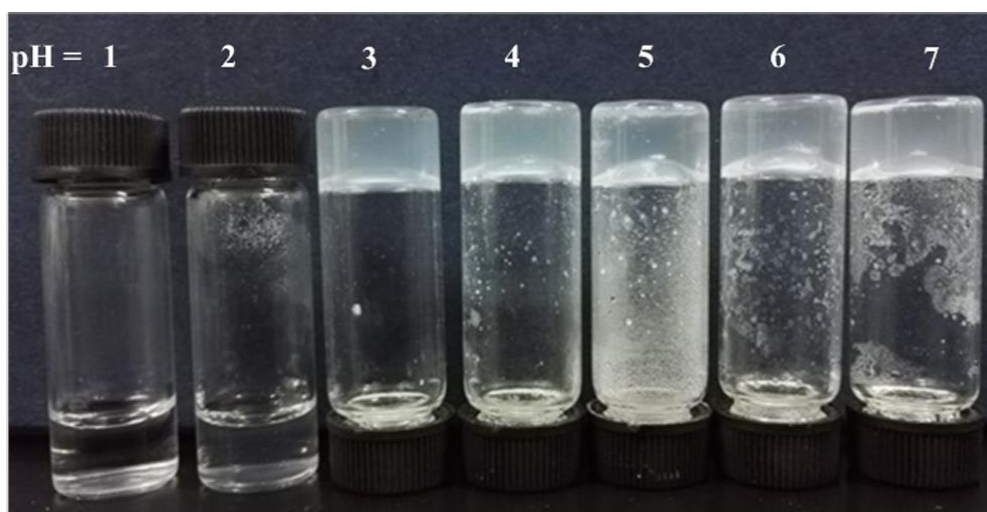

**Fig. S2** Images of **G2** at a concentration of  $10 \text{ mg mL}^{-1}$  in water under different pH (the value of pH is 1 to 7 in turn from left to right )



### 3. UV-Vis and Fluorescence Spectroscopy

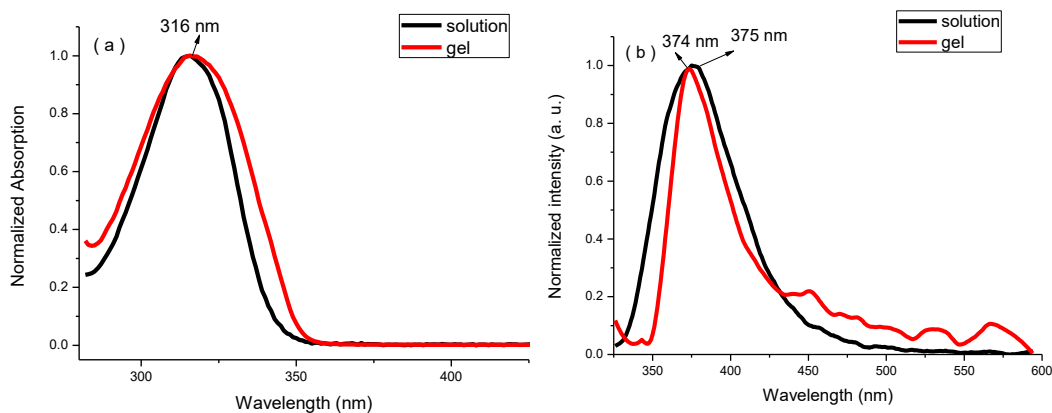

**Fig. S3** G2 at a concentration of 0.1 mM and in the gel state ( $15 \text{ mg mL}^{-1}$ ) in benzene at room temperature (a) Absorption spectra (1 mm path length) (b) Fluorescence emission spectra ( $\lambda_{\text{ex}} = 307 \text{ nm}$ ).

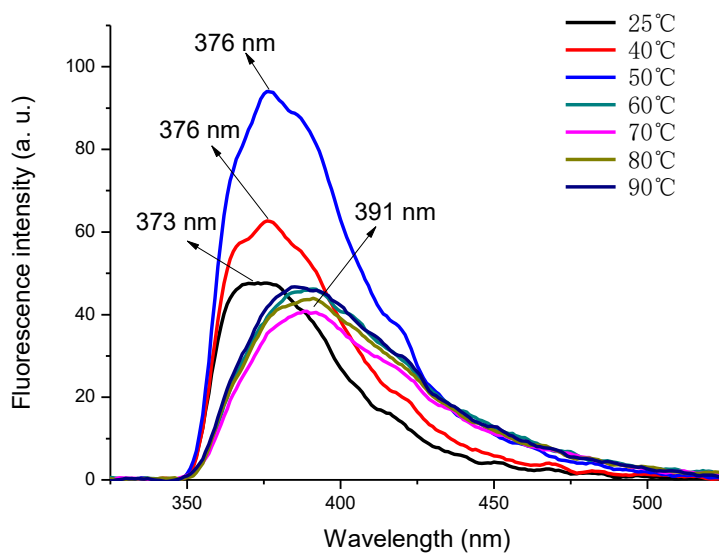

**Fig. S4** The fluorescence emission spectra change of G2 in H<sub>2</sub>O ( $10 \text{ mg mL}^{-1}$ ) at different temperature ( $\lambda_{\text{ex}} = 307 \text{ nm}$ ).

## 4. 1D and 2D NMR Spectroscopy

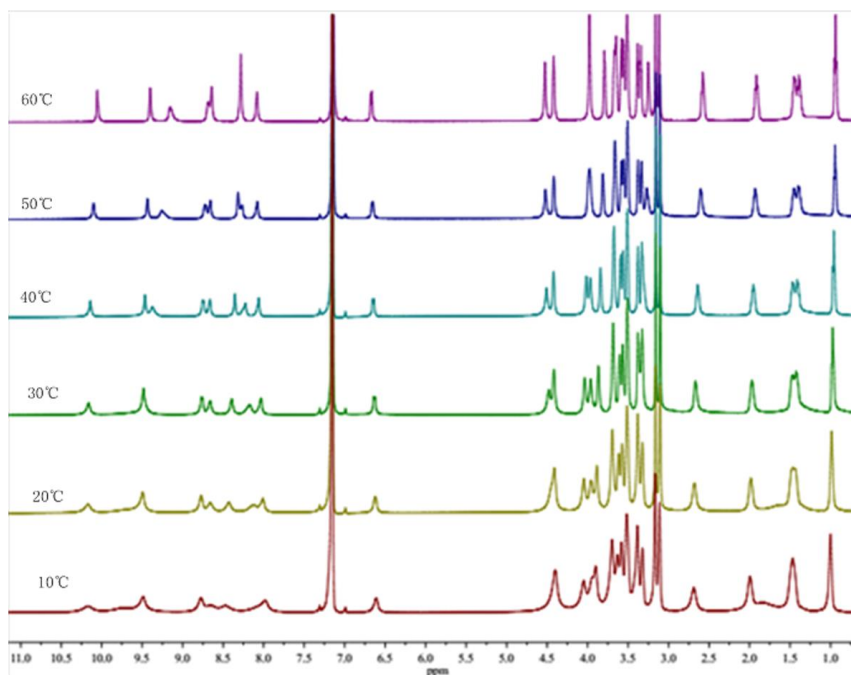

**Fig. S5** Variable temperature <sup>1</sup>H NMR spectra of compound G2 (20 mM, C<sub>6</sub>D<sub>6</sub>)

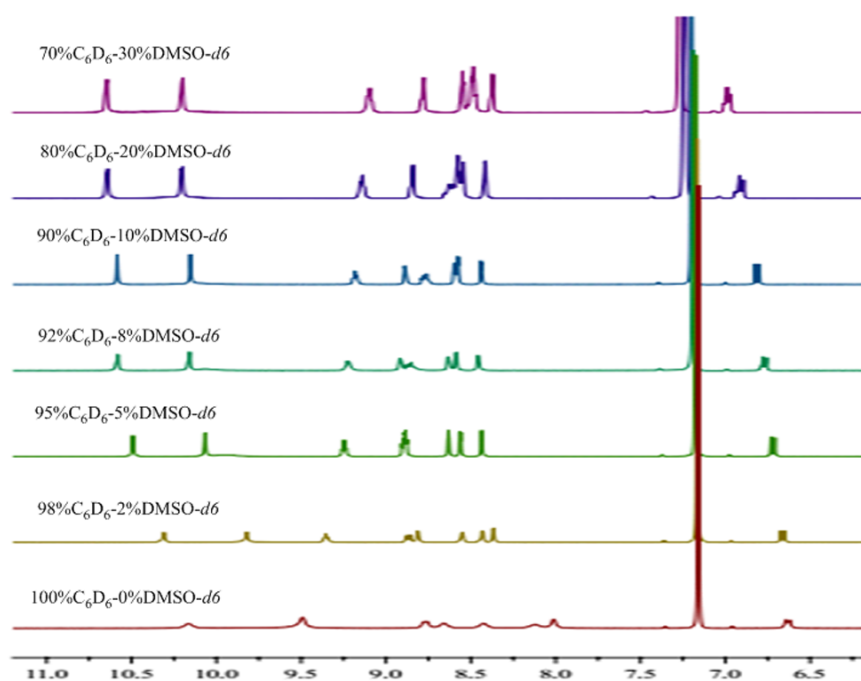

**Fig. S6** Solvent-dependent <sup>1</sup>H NMR spectra of compound G2 (20 mM, 25°C, C<sub>6</sub>D<sub>6</sub>-DMSO-*d*<sub>6</sub>)

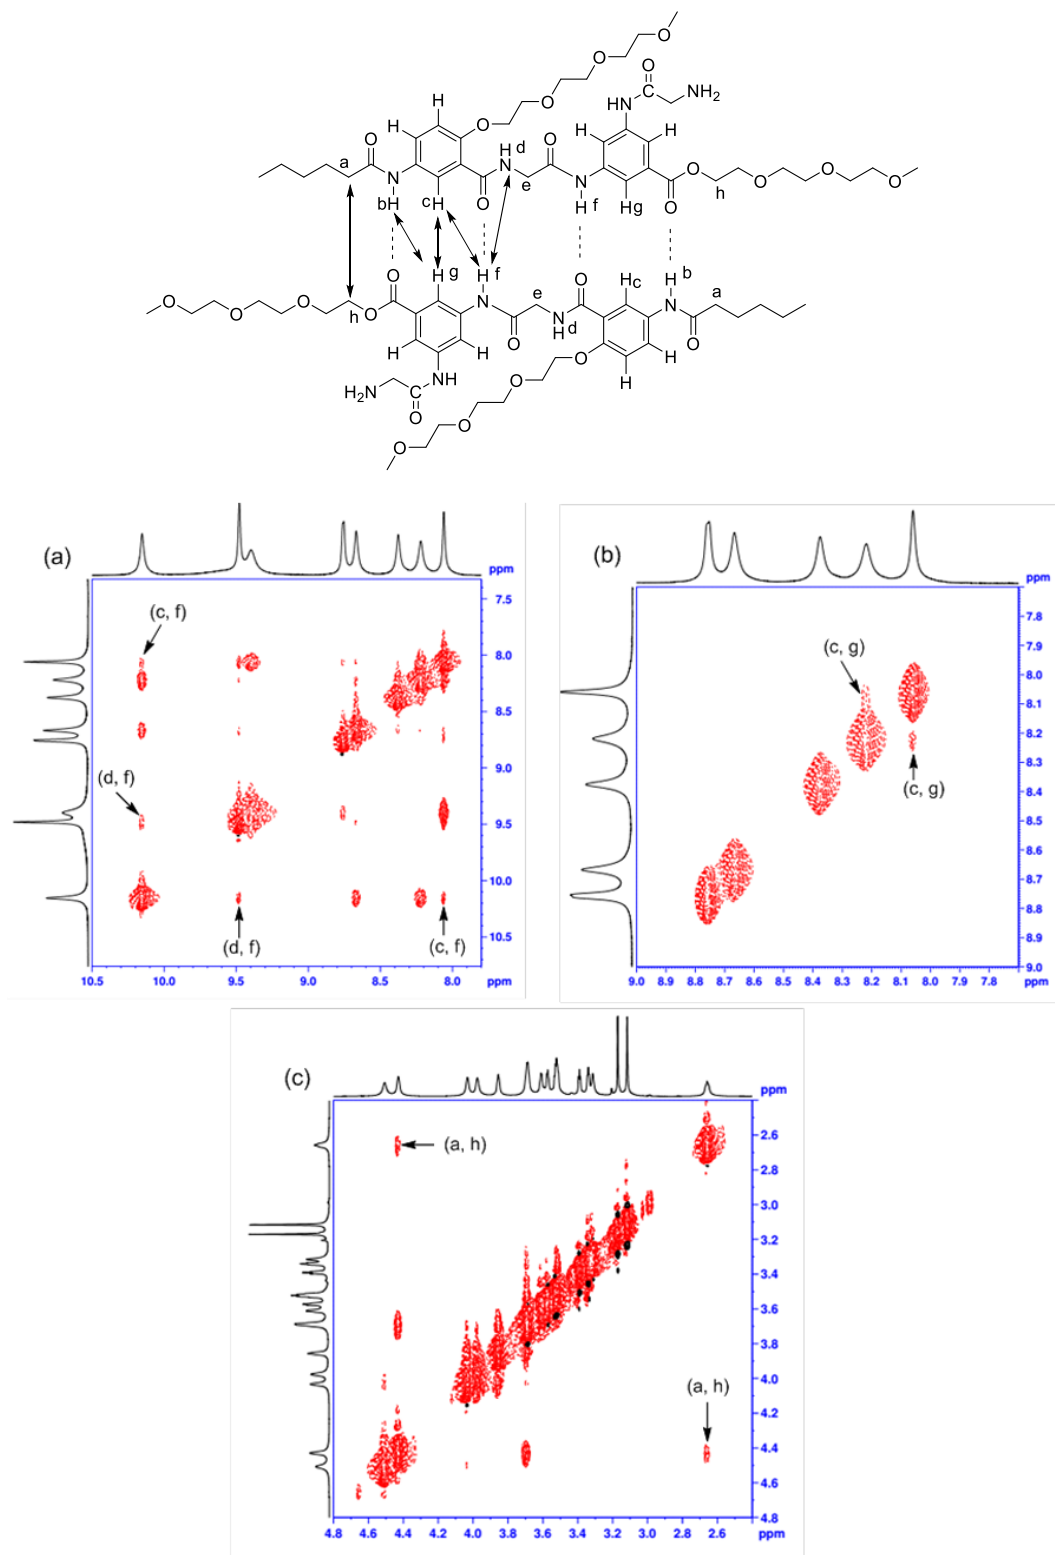

**Fig. S7** Partial Spectra of NEOSY ( G2, 20 mM in C<sub>6</sub>D<sub>6</sub>)

## 5. Loading and releasing experiments

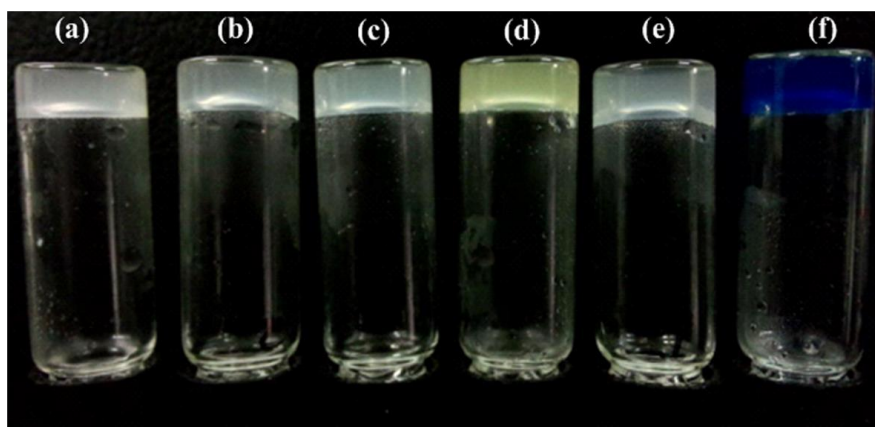

**Fig. S8** The pictures of the hydrogels with different compounds, (a) **G2** + zinc acetate, (b) **G2** + streptomycin sulphate, (c) **G2** + chloramphenicol, (d) **G2** + tetracycline, (e) **G2** + benzyl penicillin, (f) **G2** + methylene blue. The hydrogel are formed in the condition of **G2** (5.0 mg) in the aqueous solutions of different drugs (1.0 mM, 500  $\mu$ L), respectively.

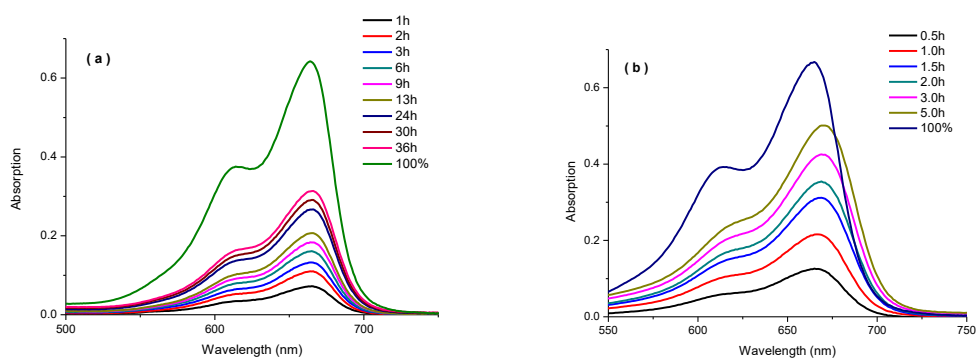

**Fig. S9** Absorption spectra of **MB** releasing from the hydrogel **G2** in different conditions, (a) pure water, (b) water containing 1% glacial acetic acid

## 6. IR, HRMS, <sup>1</sup>H NMR and <sup>13</sup>C NMR Spectra of G1-G6

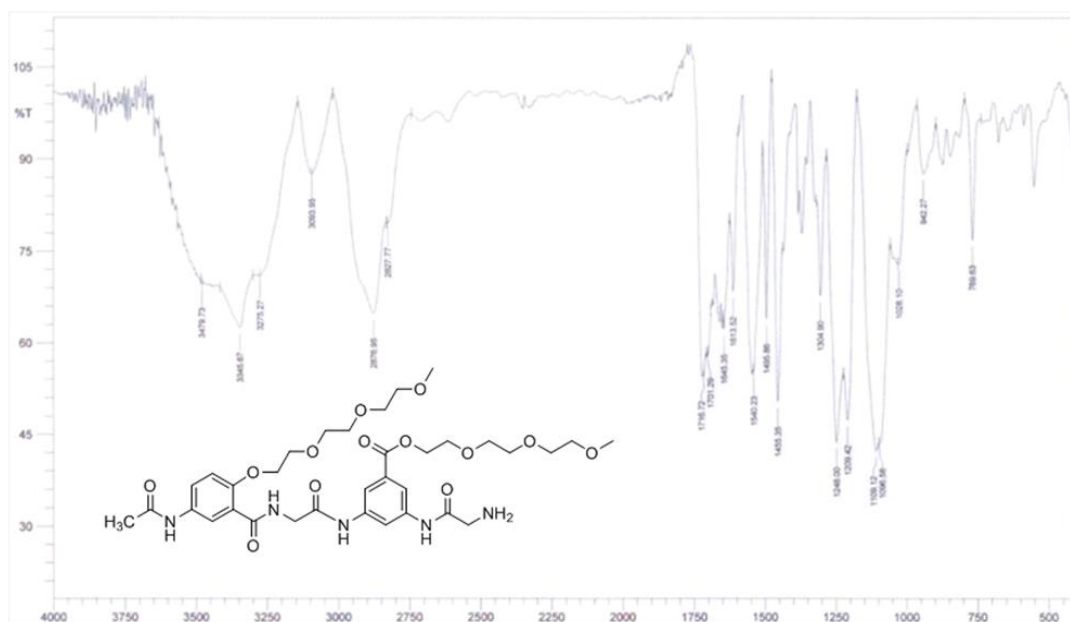

Fig. S10 IR Spectra of Compound G1

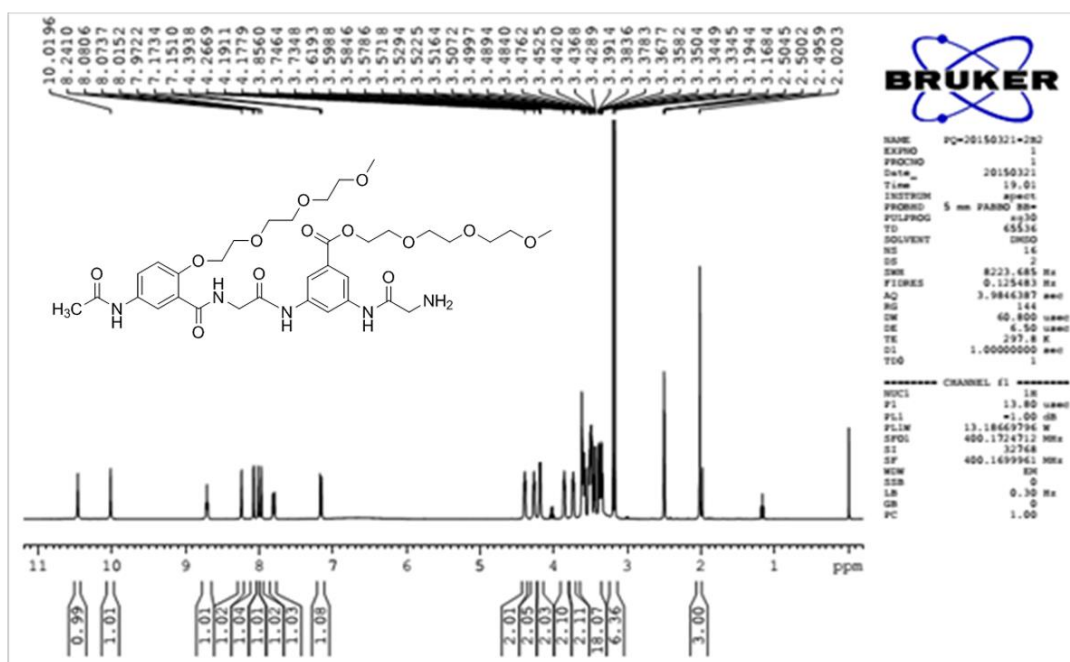

Fig. S11 <sup>1</sup>H NMR Spectra of Compound G1 (4 mM, DMSO-d<sub>6</sub>)

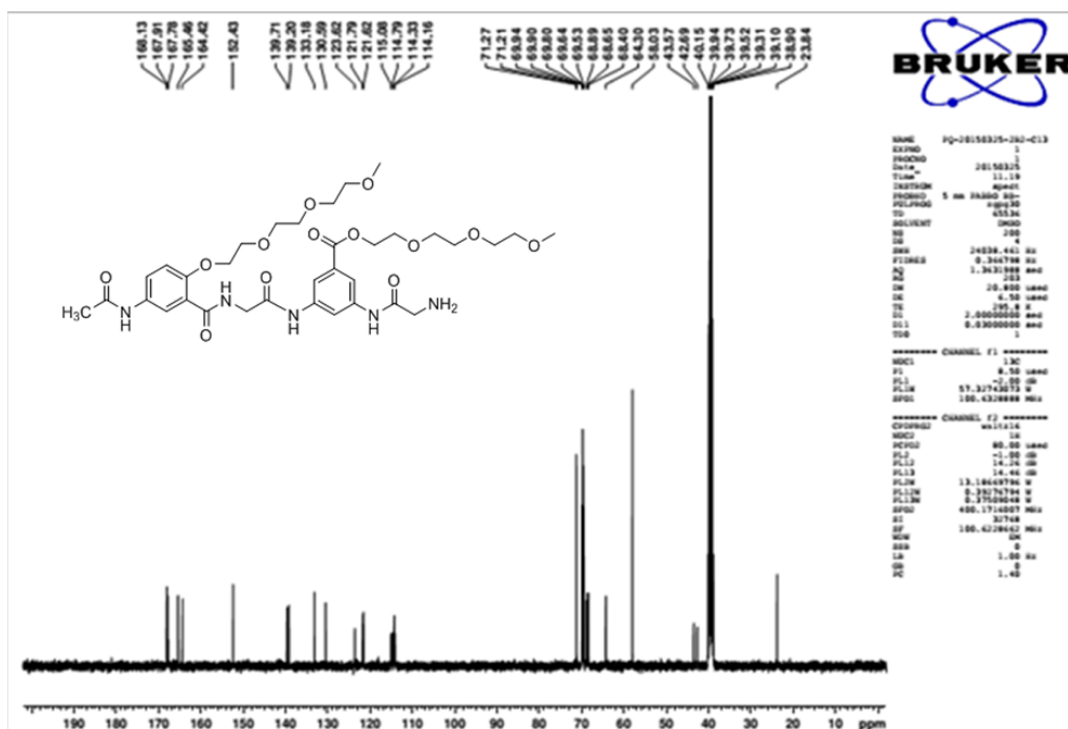

Fig. S12 <sup>13</sup>C NMR Spectra of Compound G1 (20 mM, DMSO-d<sub>6</sub>)

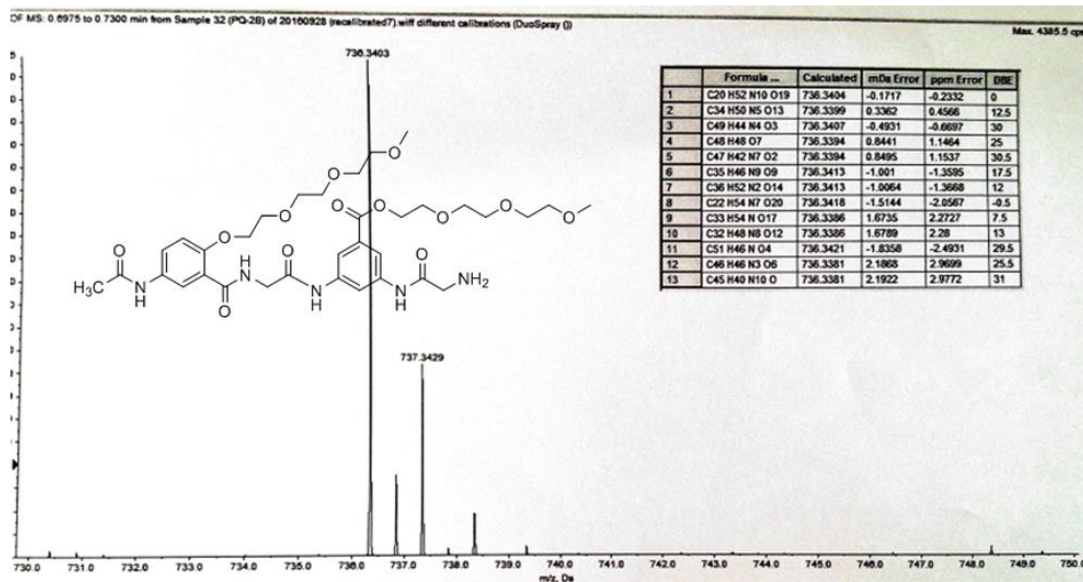

Fig. S13 HRMS Spectra of Compound G1

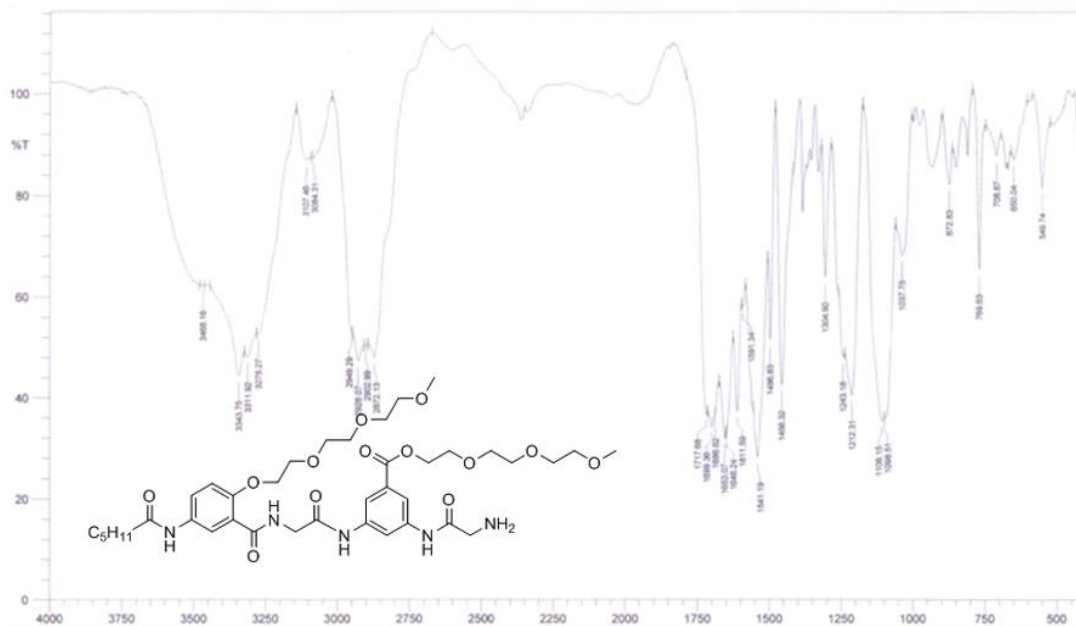

Fig. S14 IR Spectra of Compound G2

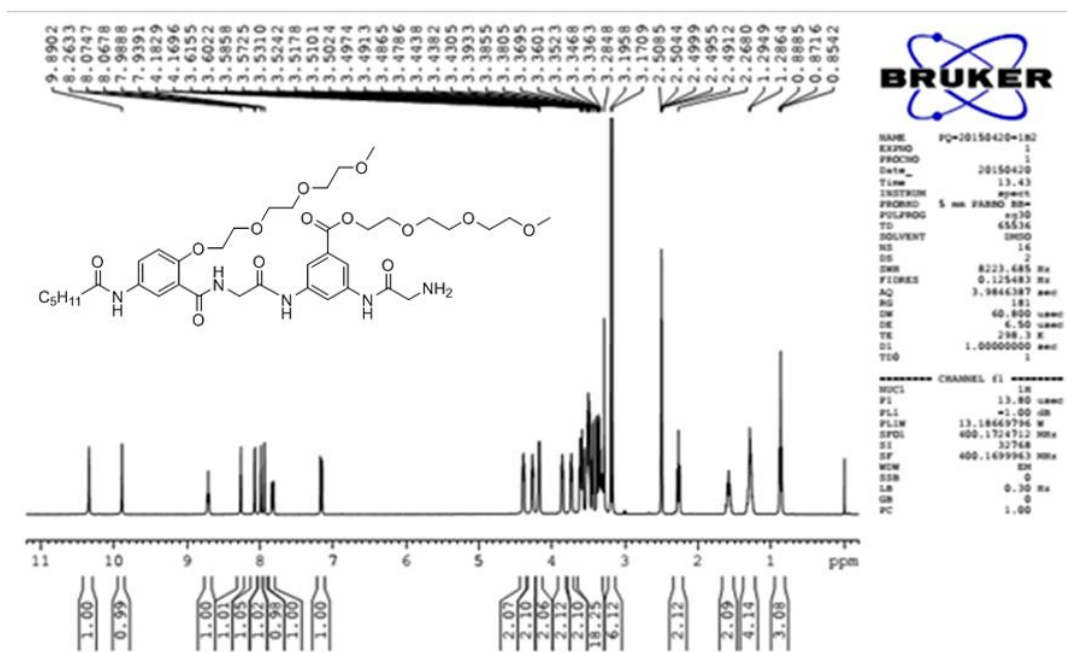

Fig. S15 <sup>1</sup>H NMR Spectra of Compound G2 (4 mM, DMSO-d<sub>6</sub>)

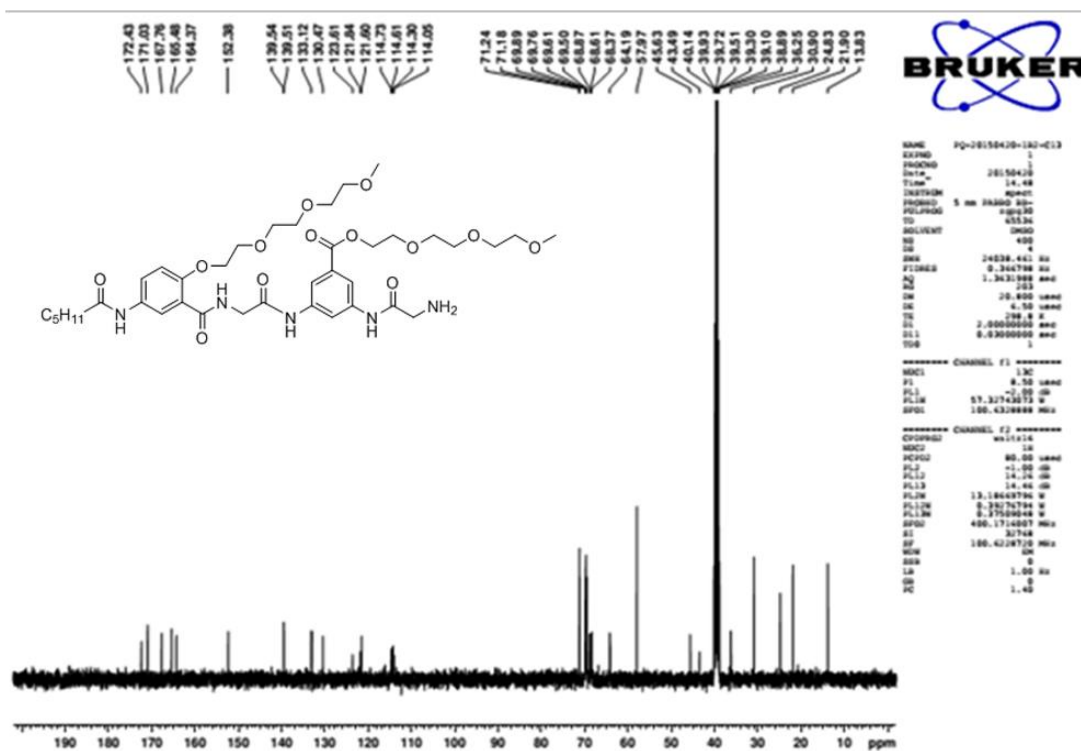

Fig. S16 <sup>13</sup>C NMR Spectra of Compound G2 (20 mM, DMSO-*d*<sub>6</sub>)

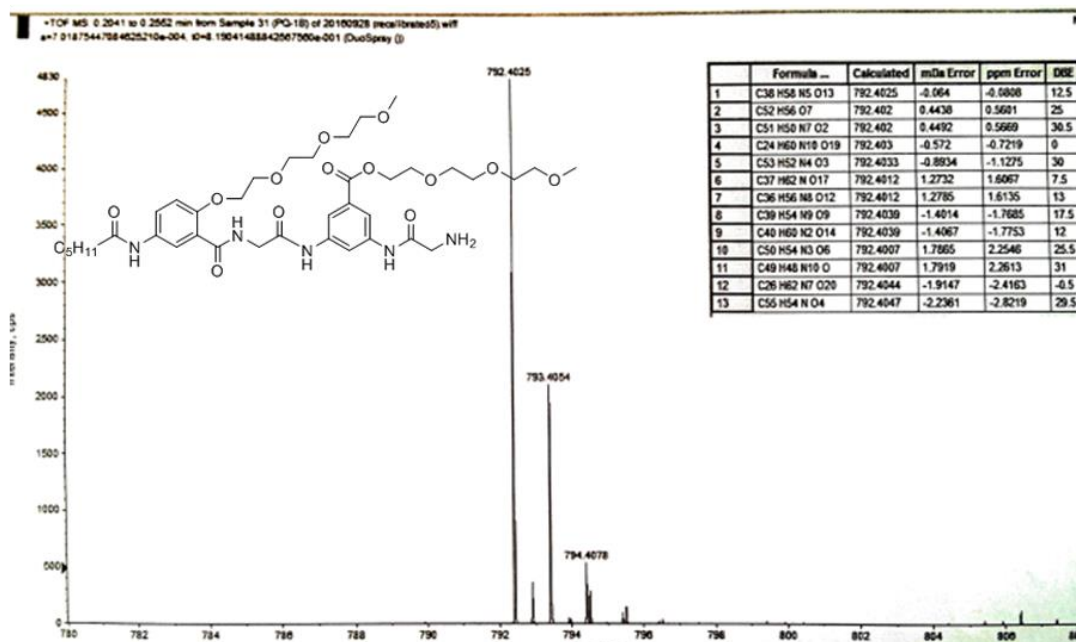

Fig. S17 HRMS Spectra of Compound G2



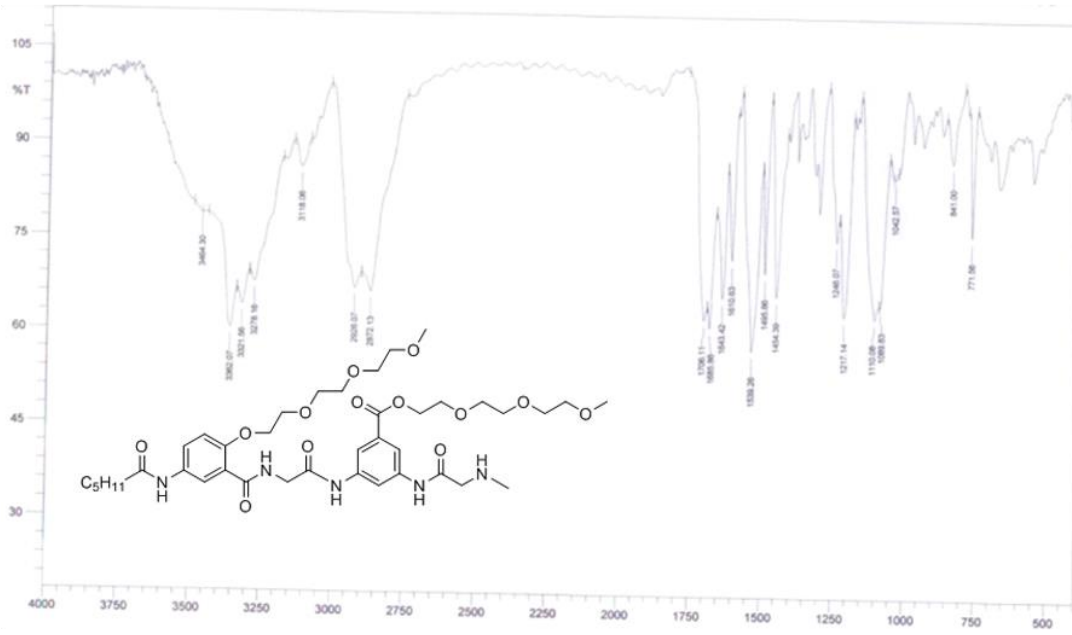

Fig. S18 IR Spectra of Compound G3

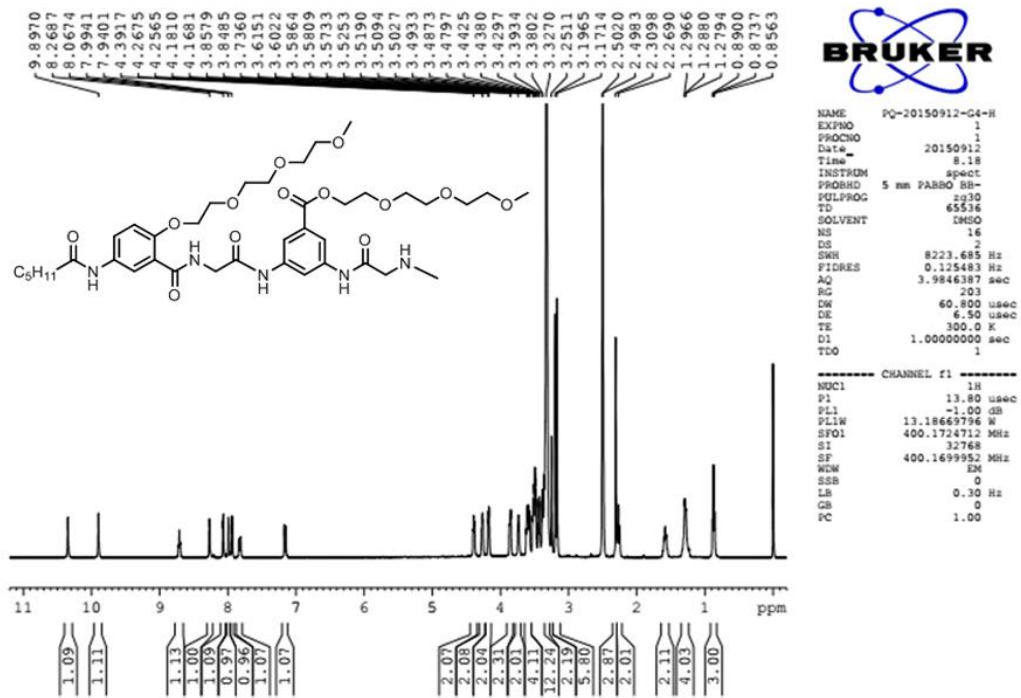

Fig. S19 <sup>1</sup>H NMR Spectra of Compound G3 (4 mM, DMSO-d<sub>6</sub>)



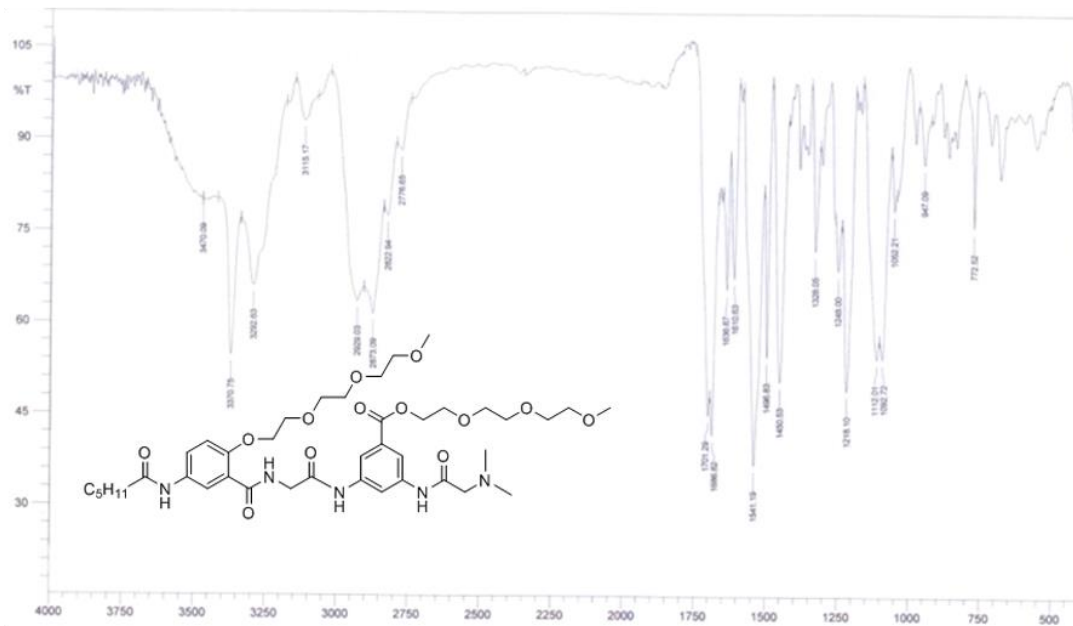

Fig. S22 IR Spectra of Compound G4

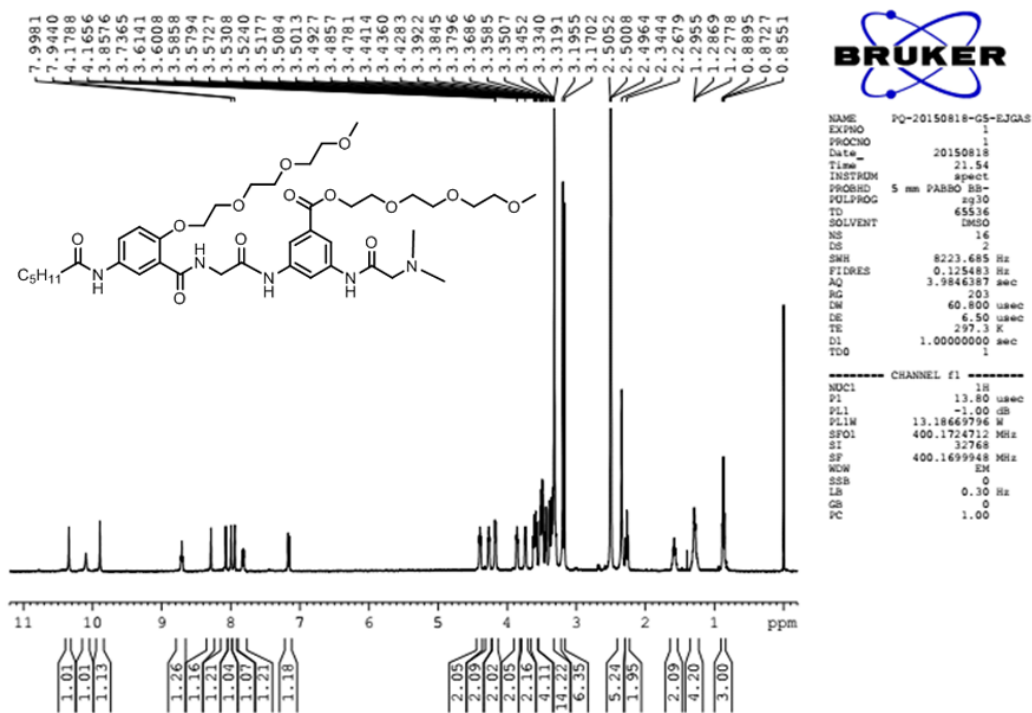

Fig. S23 <sup>1</sup>H NMR Spectra of Compound G4 (4 mM, DMSO-d<sub>6</sub>)

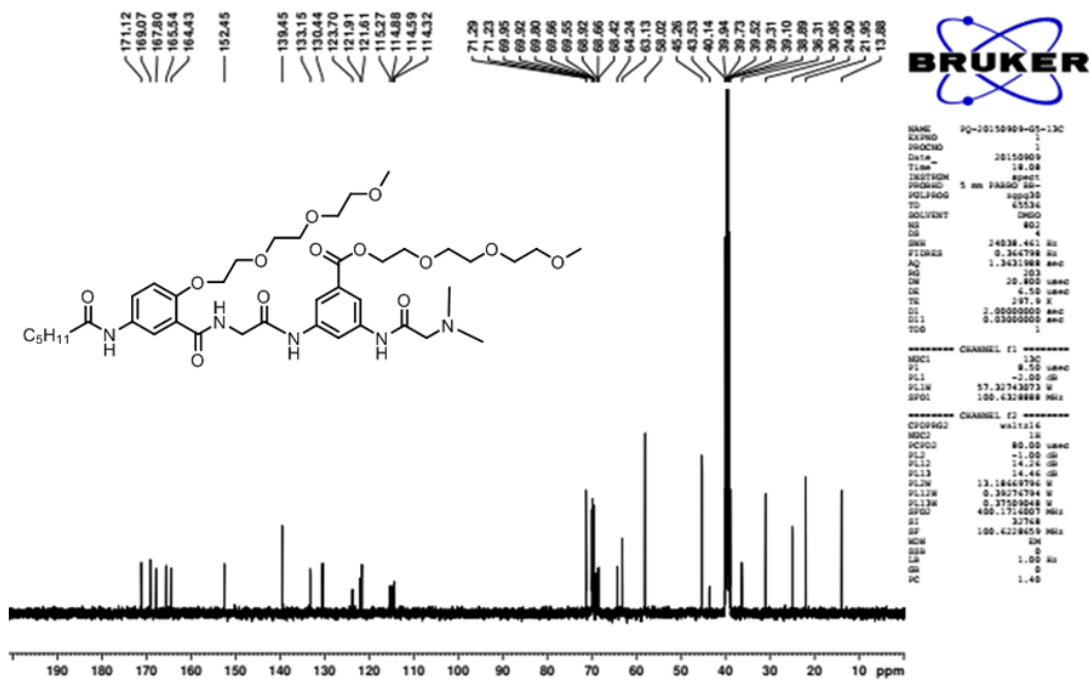

Fig. S24 <sup>13</sup>C NMR Spectra of Compound G4 (20 mM, DMSO-*d*<sub>6</sub>)

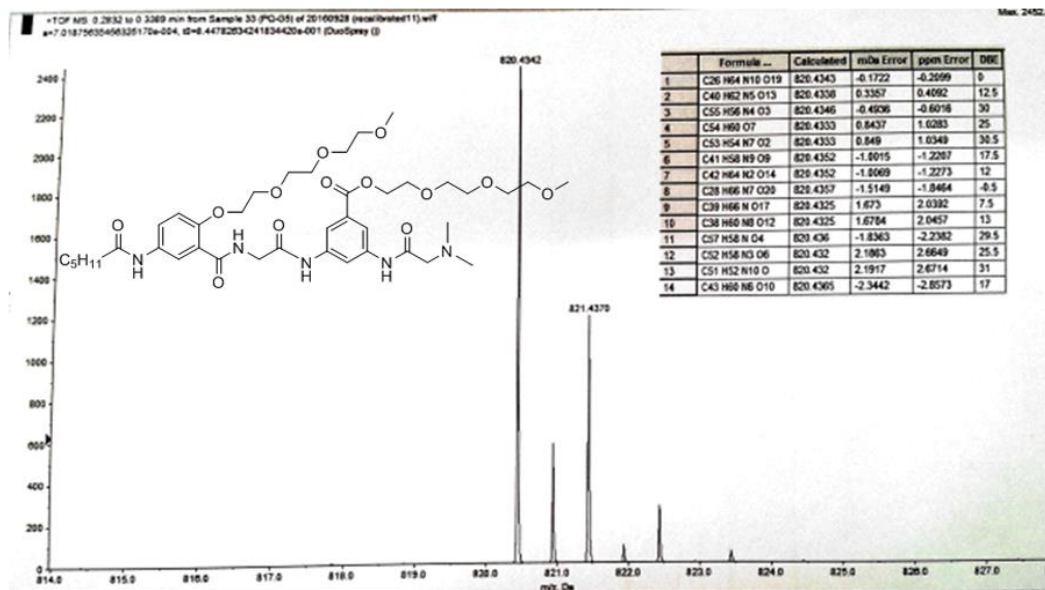

Fig. S25 HRMS Spectra of Compound G4

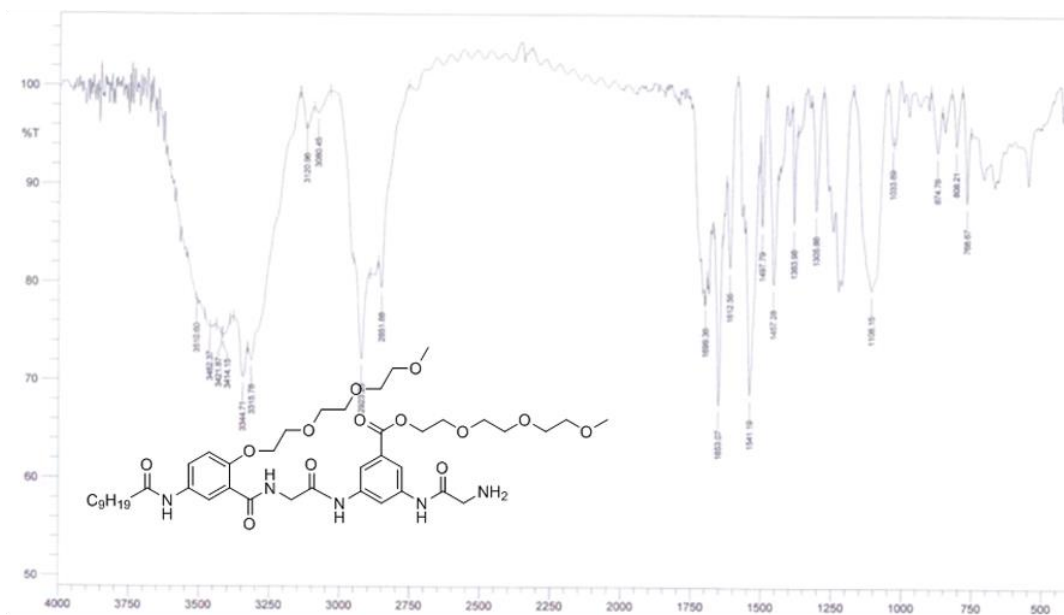

Fig. S26 IR Spectra of Compound G5

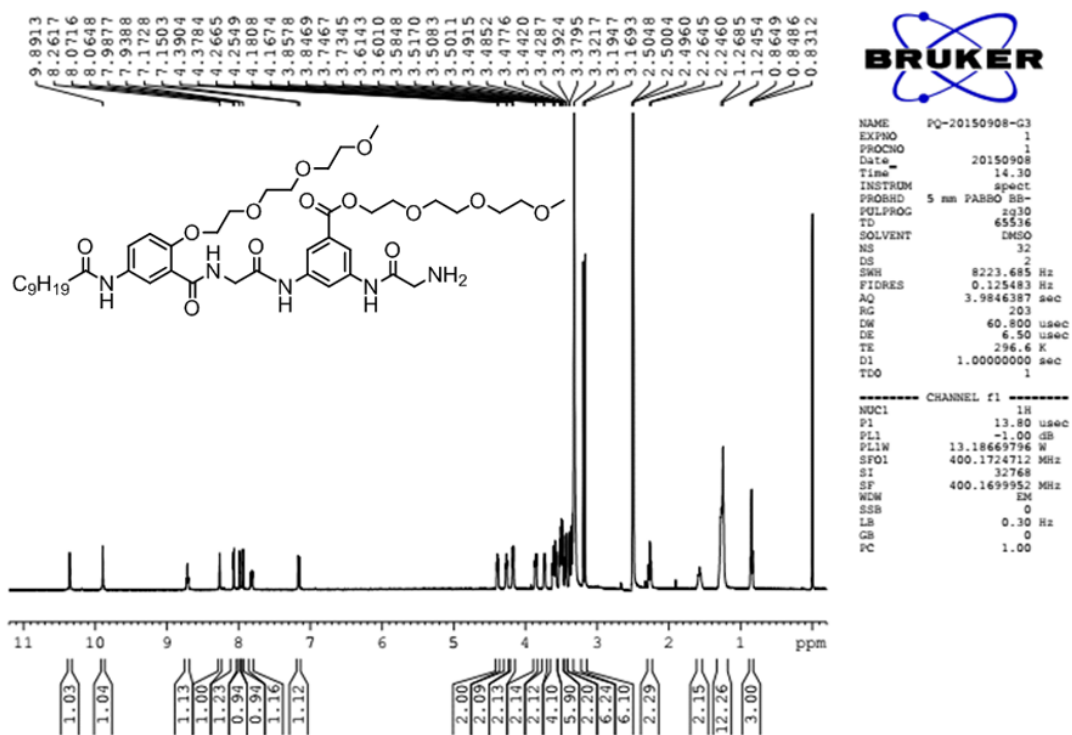

Fig. S27 <sup>1</sup>H NMR Spectra of Compound G5 (4 mM, DMSO-*d*<sub>6</sub>)

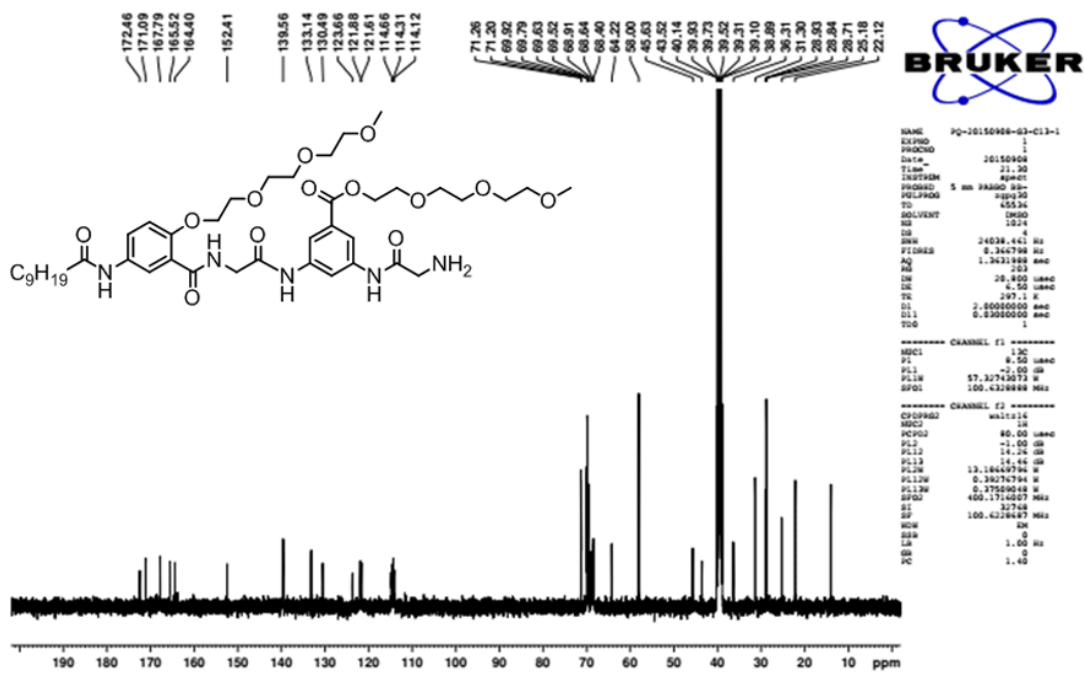

Fig. S28  $^{13}\text{C}$  NMR Spectra of Compound G5 (20 mM, DMSO- $d_6$ )

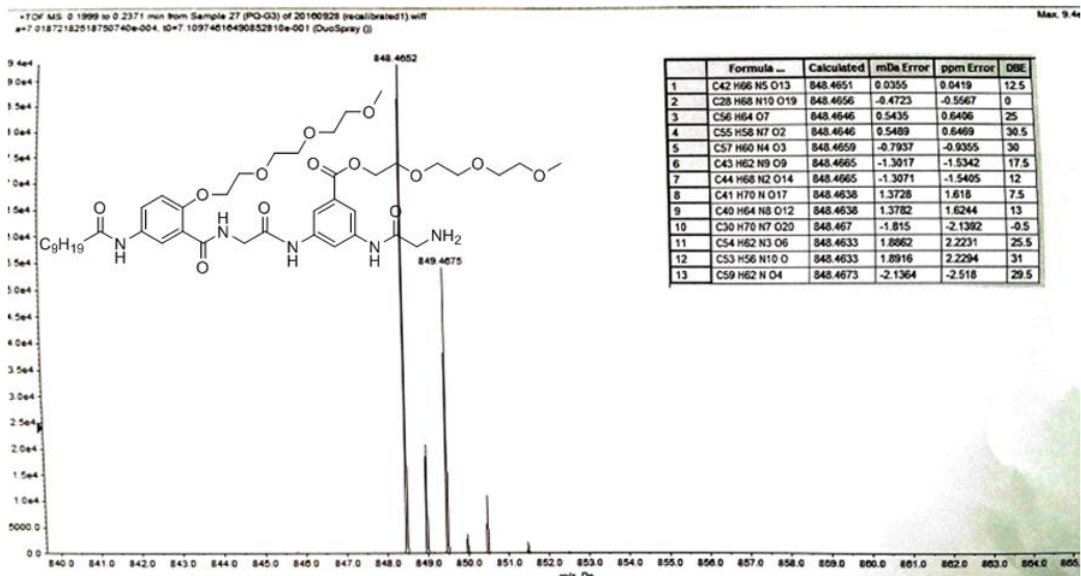

Fig. S29 HRMS Spectra of Compound G5

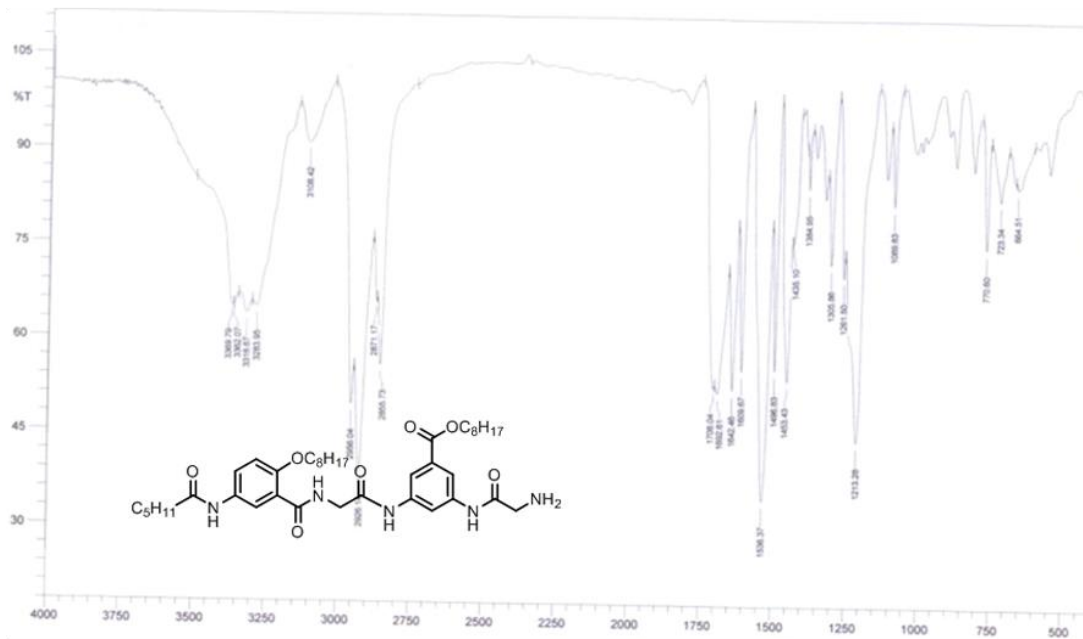

Fig. S30 IR Spectra of Compound G6

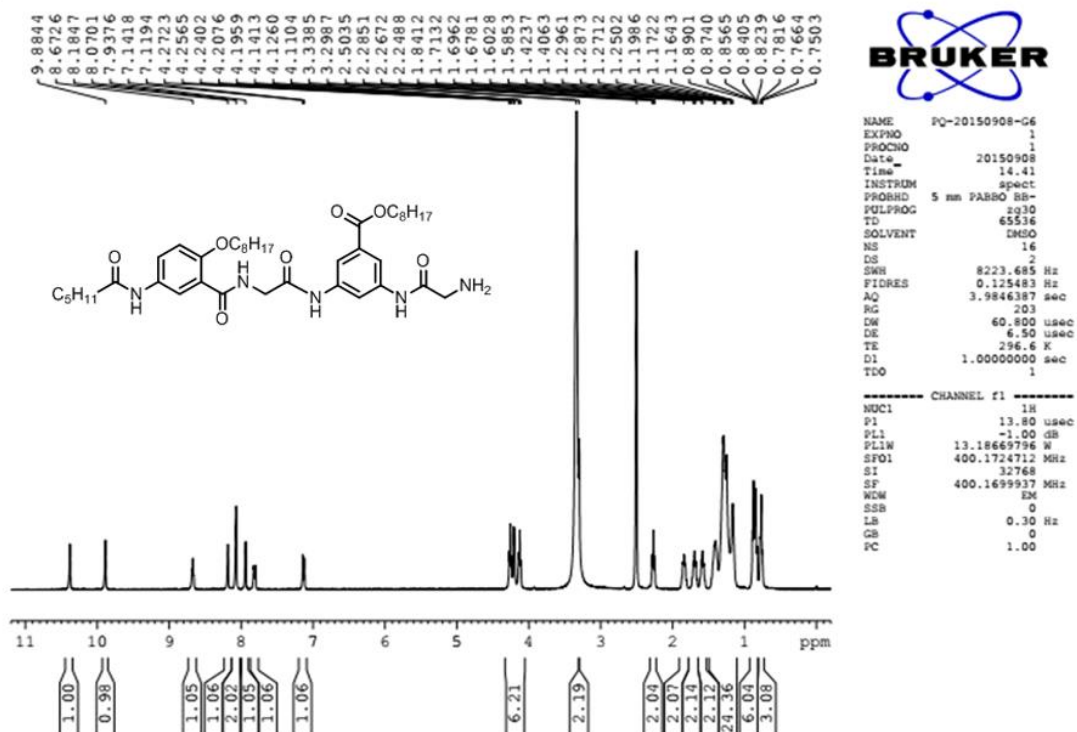

Fig. S31 <sup>1</sup>H NMR Spectra of Compound G6 (4 mM, DMSO-d<sub>6</sub>)

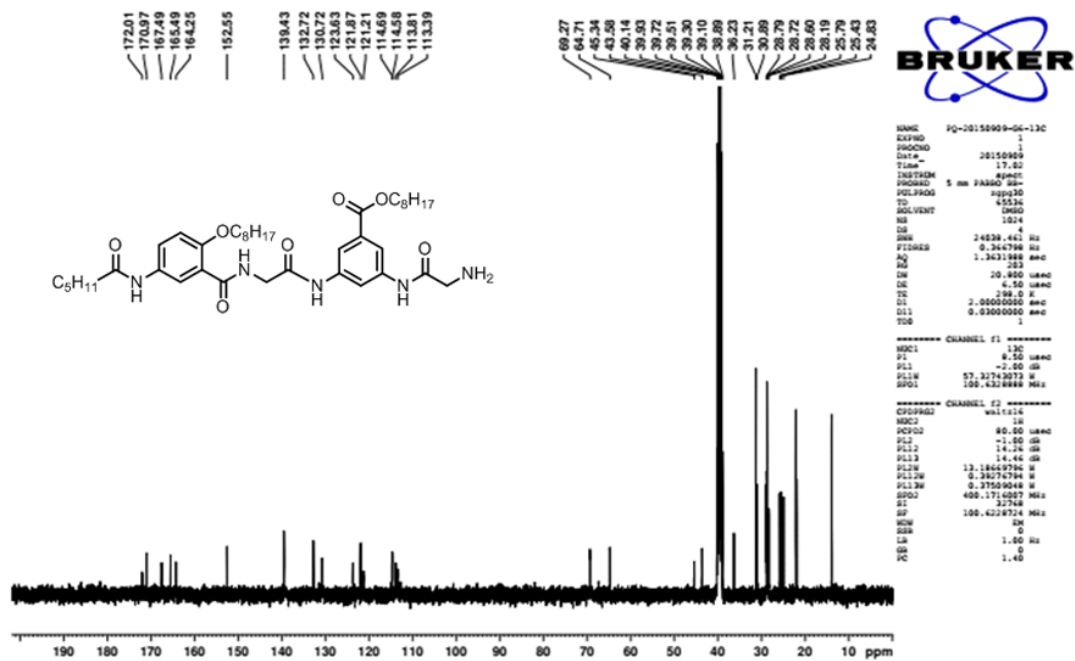

Fig. S32 <sup>13</sup>C NMR Spectra of Compound G6 (20 mM, DMSO-*d*<sub>6</sub>)

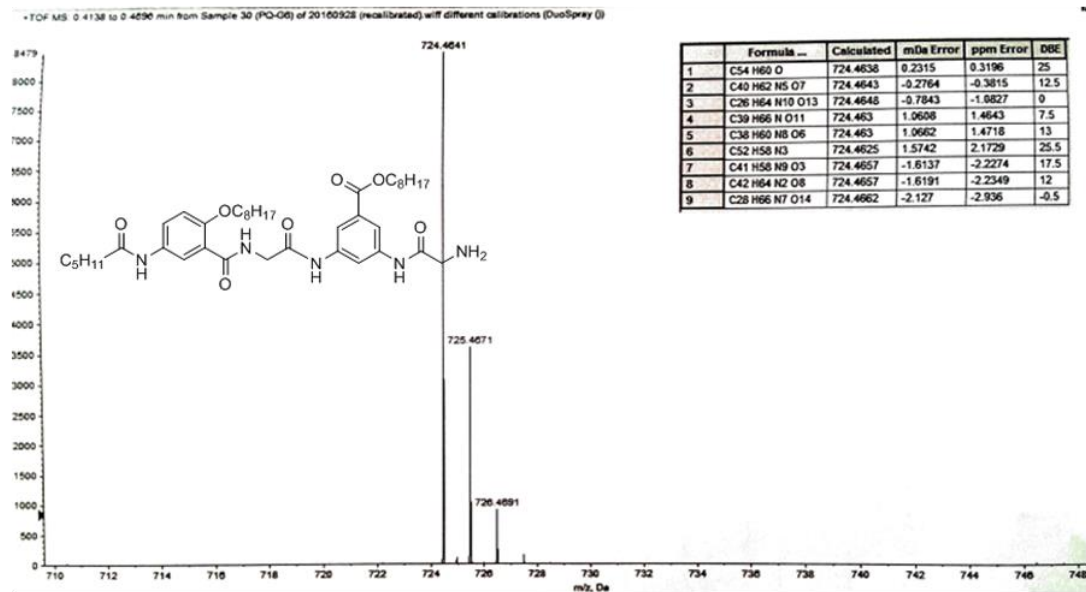

Fig. S33 HRMS Spectra of Compound G6
